# Supplementary material
Source: Springer Nature journal article supplement (https://www.springermedizin.de/resource/supplementary/12890_2013_540_MOESM1_ESM.pdf/9505706)

% CD28null NKT-like cells

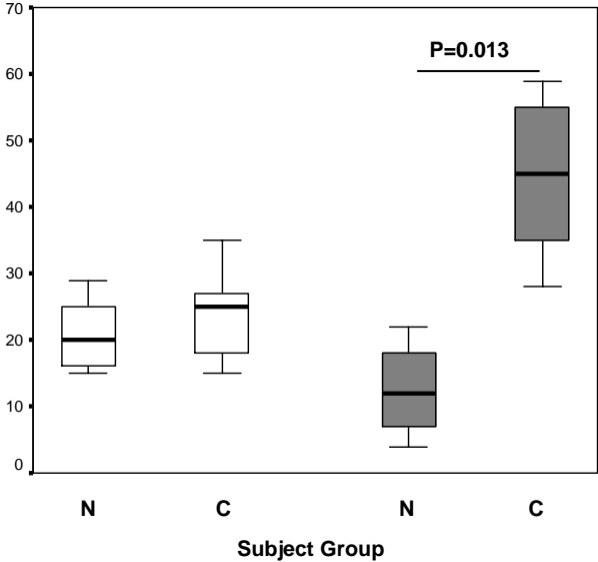

Supplement: MOESM1 [file 9505706]
